# Supplementary material for: Genetic variability within Triatoma sanguisuga complex in North America and the redescription of Triatoma ambigua (Neiva 1911), with specimens from Florida, USA
Source: Research Square preprint supplement (doi:10.21203/rs.3.rs-9955037/v1), 2026-06-11
Supplement: Supplementary file 1 [file 7196f02272f65d3bba37412c.xlsx]

## Sheet: Table 1
Supplementary Table 1. Triatoma sanguisuga Nuclear ITS-2 marker haplotypes distribution in groups.
State	N	Nh	Haplotype name (abundance)
Florida	6	3	ITS2-9 (4)	ITS2-10 (1)	ITS2-11 (1)
Texas	12	4	ITS2-1 (8)	ITS2-2 (1)	ITS2-3 (2)	ITS2-4 (1)
Mississippi	2	2	ITS2-5 (1)	ITS2-6 (1)
Alabama	1	1	ITS2-5 (1)
Virginia	1	1	ITS2-7 (1)
Tennessee	1	1	ITS2-8 (1)
N: number of specimens analyzed. Nh: number of haplotypes.
