# Supplementary material for: Genetic variability within Triatoma sanguisuga complex in North America and the redescription of Triatoma ambigua (Neiva 1911), with specimens from Florida, USA
Source: Research Square preprint supplement (doi:10.21203/rs.3.rs-9955037/v1), 2026-06-11
Supplement: Supplementary file 2 [file 734e643eb12e7f0e839d1c8d.xlsx]

## Sheet: Hoja1
Acc.Number cytb	Acc.Number ITS-2	Voucher_Identification	Haplotype cytb	State	County	Previous_Identification_(Either morphological by Lent_and_Wygodzinsky and/or genetic in NCBI deposit)	Reference
NC_050329			H_1	Florida	Highlands	Triatoma sanguisuga	Aguilera-Uribe et al. 2020
PZ124889		FLTS26	H_2	Florida	Lafayette	Triatoma ambigua	This paper
PZ124890	FLTS66	FLTS25	H_3	Florida	Lafayette	Triatoma ambigua	This paper
PZ124891		FLTS157	H_4	Florida	Wakula	Triatoma ambigua	This paper
PZ124892		FLTS29	H_5	Florida	Union	Triatoma ambigua	This paper
PZ124893		FLTS07	H_6	Florida	Levy	Triatoma ambigua	This paper
PZ124894	PZ134262	FLTS23007	H_7	Florida	Levy	Triatoma ambigua	This paper
PZ124895		FLTS158	H_8	Florida	Osceola	Triatoma ambigua	This paper
PZ124896	PZ134257	FLTS01	H_9	Florida	Alachua	Triatoma ambigua	This paper
PZ124897		FLTS20	H_10	Florida	Putnam	Triatoma ambigua	This paper
PZ124897		FLTS23017	H_10	Florida	Alachua	Triatoma ambigua	This paper
PZ124897		FLTS23025	H_10	Florida	Osceola	Triatoma ambigua	This paper
PZ124898		FLTS23006	H_11	Florida	Levy	Triatoma ambigua	This paper
PZ124899	PZ134259	FLTS06	H_12	Florida	Alachua	Triatoma ambigua	This paper
PZ124900		FLTS56	H_13	Florida	Alachua	Triatoma ambigua	This paper
PZ124901		FLTS06	H_14	Florida	Levy	Triatoma ambigua	This paper
PZ124901		FLTS23008	H_14	Florida	Levy	Triatoma ambigua	This paper
PZ124901		FLTS23009	H_14	Florida	Levy	Triatoma ambigua	This paper
PZ124902	PZ134261	FLTS66	H_15	Florida	Alachua	Triatoma ambigua	This paper
HQ141281			H_16	Louisiana	Orleans	Triatoma sanguisuga	De la Rua et al. 2011
HQ141280			H_17	Louisiana	Orleans	Triatoma sanguisuga	De la Rua et al. 2011
HQ141282			H_18	Louisiana	Orleans	Triatoma sanguisuga	De la Rua et al. 2011
HQ141283			H_18	Louisiana	Orleans	Triatoma sanguisuga	De la Rua et al. 2011
HQ141286			H_19	Louisiana	Orleans	Triatoma sanguisuga	De la Rua et al. 2011
HQ141285			H_20	Louisiana	Orleans	Triatoma sanguisuga	De la Rua et al. 2011
HQ141284			H_21	Louisiana	Orleans	Triatoma sanguisuga	De la Rua et al. 2011
HQ141298			H_22	Louisiana	Orleans	Triatoma sanguisuga	De la Rua et al. 2011
HQ141300			H_23	Louisiana	Orleans	Triatoma sanguisuga	De la Rua et al. 2011
HQ141299			H_24	Louisiana	Orleans	Triatoma sanguisuga	De la Rua et al. 2011
HQ141297			H_25	Louisiana	Orleans	Triatoma sanguisuga	De la Rua et al. 2011
HQ141290			H_26	Louisiana	Orleans	Triatoma sanguisuga	De la Rua et al. 2011
HQ141289			H_27	Louisiana	Orleans	Triatoma sanguisuga	De la Rua et al. 2011
HQ141288			H_28	Louisiana	Orleans	Triatoma sanguisuga	De la Rua et al. 2011
HQ141287			H_29	Louisiana	Orleans	Triatoma sanguisuga	De la Rua et al. 2011
HQ141301			H_30	Louisiana	Orleans	Triatoma sanguisuga	De la Rua et al. 2011
HQ141296			H_31	Louisiana	Orleans	Triatoma sanguisuga	De la Rua et al. 2011
HQ141295			H_32	Louisiana	Orleans	Triatoma sanguisuga	De la Rua et al. 2011
HQ141294			H_33	Louisiana	Orleans	Triatoma sanguisuga	De la Rua et al. 2011
HQ141293			H_34	Louisiana	Orleans	Triatoma sanguisuga	De la Rua et al. 2011
HQ141292			H_35	Louisiana	Orleans	Triatoma sanguisuga	De la Rua et al. 2011
HQ141291			H_36	Louisiana	Orleans	Triatoma sanguisuga	De la Rua et al. 2011
HQ141307			H_37	Louisiana	Orleans	Triatoma sanguisuga	De la Rua et al. 2011
KY305702		PS0002	H_38	Texas	Brazos	Triatoma sanguisuga	Curtis-Robles et al. 2018
PZ124903		PS4111	H_39	Texas	Grayson	Triatoma sanguisuga	This paper
HQ141305			H_40	Louisiana	Orleans	Triatoma sanguisuga	De la Rua et al. 2011
HQ141304			H_41	Louisiana	Iberville	Triatoma sanguisuga	De la Rua et al. 2011
HQ141303			H_42	Louisiana	Orleans	Triatoma sanguisuga	De la Rua et al. 2011
PZ124904			H_43	Louisiana	No data	Triatoma sanguisuga	This paper
HQ141306			H_44	Louisiana	Orleans	Triatoma sanguisuga	De la Rua et al. 2011
PZ124905		FLTS161	H_45	Florida	Santa Rosa	Triatoma sanguisuga	This paper
HQ141302			H_46	Louisiana	Orleans	Triatoma sanguisuga	De la Rua et al. 2011
HQ141309			H_47	Louisiana	Orleans	Triatoma sanguisuga	De la Rua et al. 2011
HQ141308			H_48	Louisiana	Orleans	Triatoma sanguisuga	De la Rua et al. 2011
HQ141311			H_49	Louisiana	Orleans	Triatoma sanguisuga	De la Rua et al. 2011
HQ141312			H_50	Louisiana	Orleans	Triatoma sanguisuga	De la Rua et al. 2011
HQ141310			H_51	Louisiana	Orleans	Triatoma sanguisuga	De la Rua et al. 2011
HQ141313			H_52	Louisiana	Orleans	Triatoma sanguisuga	De la Rua et al. 2011
PZ124906		PS6124	H_53	Alabama	Baldwin	Triatoma sanguisuga	This paper
PZ124907	PZ134252	PS4743	H_54	Mississippi	Jackson	Triatoma sanguisuga	This paper
PZ124908		PS6064	H_55	Virginia	Henrico	Triatoma sanguisuga	This paper
PZ124909		PS6036	H_56	Tennessee	Hamilton	Triatoma sanguisuga	This paper
PZ124910	PZ134254	PS5510	H_57	Alabama	Blount	Triatoma sanguisuga	This paper
PZ124911	PZ134255	PS5588	H_58	Virginia	Montgomery	Triatoma sanguisuga	This paper
PZ124911	PZ134256	PS6037	H_58	Tennessee	Hamilton	Triatoma sanguisuga	This paper
MT702377		RK90	H_59	Texas	Guadalupe	Triatoma sanguisuga	Kilgore et al. Unpublished
KY305693		Barnes013	H_60	Texas	Uvalde	Triatoma sanguisuga	Curtis-Robles et al. 2018
KY305696		Barnes025	H_60	Texas	Uvalde	Triatoma sanguisuga	Curtis-Robles et al. 2018
KY305695		Barnes017	H_61	Texas	Uvalde	Triatoma sanguisuga	Curtis-Robles et al. 2018
PZ124912	PZ134251	PS3309	H_62	Texas	Lee	Triatoma sanguisuga	This paper
MT702362		RK02	H_63	Texas	Hays	Triatoma sanguisuga	Kilgore et al. unpublished
KY305690		AZ18	H_64	Texas	Hays	Triatoma indictiva	Curtis-Robles et al. 2018
MT702365		RK15	H_65	Texas	Hays	Triatoma sanguisuga	Kilgore et al. unpublished
MT702363		RK06	H_66	Texas	Hays	Triatoma sanguisuga	Kilgore et al. unpublished
PZ124913		PS4259	H_67	Texas	Lavaca	Triatoma sanguisuga	This paper
PZ124914	PZ134246	PS6075	H_68	Texas	Lampasas	Triatoma sanguisuga	This paper
PZ124915		PS5365	H_69	Texas	Stephens	Triatoma sanguisuga	This paper
KY305720		PS682	H_70	Texas	Blanco	Triatoma indictiva	Curtis-Robles et al. 2018
PZ124916		PS4621	H_70	Texas	Burnet	Triatoma sanguisuga	This paper
KY305724		PS809	H_71	Texas	Callahan	Triatoma indictiva	Curtis-Robles et al. 2018
MT702368		RK21	H_72	Texas	Guadalupe	Triatoma sanguisuga	Kilgore et al. unpublished
KY305706		PS079	H_73	Texas	Frio	Triatoma species unknown - adult	Curtis-Robles et al. 2018
MT702369		RK23	H_74	Texas	Hays	Triatoma sanguisuga	Kilgore et al. unpublished
KY305689		AZ16	H_75	Texas	Hays	Triatoma sanguisuga	Curtis-Robles et al. 2018
PZ124917		PS6403	H_76	Texas	Travis	Triatoma sanguisuga	This paper
PZ124918		PS4300	H_77	Texas	Wilson	Triatoma sanguisuga	This paper
PZ124919		PS1931	H_78	Texas	Brazos	Triatoma sanguisuga	This paper
KY305717		PS454	H_79	Texas	Williamson	Triatoma sanguisuga	Curtis-Robles et al. 2018
PZ124921	PZ134241	PS3440	H_80	Texas	Lubbock	Triatoma sanguisuga	This paper
MT702374		RK47	H_81	Texas	Caldwell	Triatoma sanguisuga	Kilgore et al. unpublished
MT702375		RK48	H_81	Texas	Caldwell	Triatoma sanguisuga	Kilgore et al. unpublished
MT702380		RK98	H_82	Texas	Guadalupe	Triatoma sanguisuga	Kilgore et al. unpublished
KY305708		PS099	H_83	Texas	Atascosa	Triatoma sanguisuga	Curtis-Robles et al. 2018
PZ124923		PS3128	H_84	Texas	Fayette	Triatoma sanguisuga	This paper
MT702370		RK24	H_85	Texas	Hays	Triatoma sanguisuga	Kilgore et al. unpublished
MT702364		RK12	H_86	Texas	Hays	Triatoma sanguisuga	Kilgore et al. unpublished
MT702366		RK16	H_86	Texas	Hays	Triatoma sanguisuga	Kilgore et al. unpublished
MT702371		RK27	H_87	Texas	Guadalupe	Triatoma sanguisuga	Kilgore et al. unpublished
KY305691		AZ28	H_88	Texas	Hays	Triatoma indictiva	Curtis-Robles et al. 2018
KY305721		PS687	H_88	Texas	Hamilton	Triatoma sanguisuga	Curtis-Robles et al. 2018
MT702367		RK20	H_89	Texas	Guadalupe	Triatoma sanguisuga	Kilgore et al. unpublished
MT702381		RK99	H_89	Texas	Guadalupe	Triatoma sanguisuga	Kilgore et al. unpublished
KY305722		PS728	H_90	Texas	Hays	Triatoma species unknown - nymph	Curtis-Robles et al. 2018
KF188643		SAK-2013 6-29	H_91	Texas	Comal	Triatoma species unknown - nymph	Kjos et al. 2013
KF188652		SAK-2013 6-42	H_91	Texas	Comal	Triatoma species unknown - nymph	Kjos et al. 2013
KF188654		SAK-2013 6-29	H_91	Texas	Comal	Triatoma species unknown - nymph	Kjos et al. 2013
KF188644		SAK-2013 6-30	H_91	Texas	Comal	Triatoma species unknown - nymph	Kjos et al. 2013
KF188645		SAK-2013 6-33	H_91	Texas	Comal	Triatoma species unknown - nymph	Kjos et al. 2013
KF188646		SAK-2013 6-36	H_91	Texas	Comal	Triatoma species unknown - nymph	Kjos et al. 2013
KF188647		SAK-2013 6-37	H_91	Texas	Comal	Triatoma species unknown - nymph	Kjos et al. 2013
KF188648		SAK-2013 6-38	H_91	Texas	Comal	Triatoma species unknown - nymph	Kjos et al. 2013
KF188649		SAK-2013 6-39	H_91	Texas	Comal	Triatoma species unknown - nymph	Kjos et al. 2013
KF188650		SAK-2013 6-40	H_91	Texas	Comal	Triatoma species unknown - nymph	Kjos et al. 2013
KF188651		SAK-2013 6-41	H_91	Texas	Comal	Triatoma species unknown - nymph	Kjos et al. 2013
KF188653		SAK-2013 6-43	H_91	Texas	Comal	Triatoma species unknown - nymph	Kjos et al. 2013
KF188655		SAK-2013 6-45	H_91	Texas	Comal	Triatoma species unknown - nymph	Kjos et al. 2013
KF188656		SAK-2013 6-46	H_91	Texas	Comal	Triatoma species unknown - nymph	Kjos et al. 2013
KF188657		SAK-2013 6-47	H_91	Texas	Comal	Triatoma species unknown - nymph	Kjos et al. 2013
KF188658		SAK-2013 6-48	H_91	Texas	Comal	Triatoma species unknown - nymph	Kjos et al. 2013
KF188659		SAK-2013 6-49	H_91	Texas	Comal	Triatoma species unknown - nymph	Kjos et al. 2013
KF188660		SAK-2013 6-50	H_91	Texas	Comal	Triatoma species unknown - nymph	Kjos et al. 2013
KF188661		SAK-2013 6-51	H_91	Texas	Comal	Triatoma species unknown - nymph	Kjos et al. 2013
KF188662		SAK-2013 6-52	H_91	Texas	Comal	Triatoma species unknown - nymph	Kjos et al. 2013
KF188663		SAK-2013 6-53	H_91	Texas	Comal	Triatoma species unknown - nymph	Kjos et al. 2013
MT702376		RK85	H_92	Texas	Caldwell	Triatoma sanguisuga	Kilgore et al. unpublished
PZ124920		PS6534	H_93	Texas	Gillespie	Triatoma sanguisuga	This paper
KY305730		PS1250	H_94	Texas	Taylor	Triatoma indictiva	Curtis-Robles et al. 2018
KY305731		PS1252	H_94	Texas	Taylor	Triatoma indictiva	Curtis-Robles et al. 2018
KY305732		PS1253	H_94	Texas	Taylor	Triatoma indictiva	Curtis-Robles et al. 2018
KY305733		PS1254	H_94	Texas	Taylor	Triatoma indictiva	Curtis-Robles et al. 2018
KY305698		EL015	H_95	Texas	Blanco	Triatoma sanguisuga	Curtis-Robles et al. 2018
HQ141314			H_96	Louisiana	Orleans	Triatoma sanguisuga	De la Rua et al. 2011
PZ124922	PZ134245	PS3088	H_97	Texas	Fort Bend	Triatoma sanguisuga	This paper
PZ124924		PS5159	H_98	Texas	McLennan	Triatoma sanguisuga	This paper
PZ124925	PZ134242	PS6592	H_99	Texas	Somervell	Triatoma sanguisuga	This paper
PZ124926		PS1918	H_100	Texas	Robertson	Triatoma sanguisuga	This paper
PZ124927		PS3838	H_101	Texas	Robertson	Triatoma sanguisuga	This paper
PZ124928	PZ134249	PS6723	H_102	Texas	Montgomery	Triatoma sanguisuga	This paper
PZ124929	PZ134244	PS6500	H_103	Texas	Waller	Triatoma sanguisuga	This paper
PZ124930	PZ134243	PS3223	H_104	Texas	Harris	Triatoma sanguisuga	This paper
PZ124931	PZ134240	PS6719	H_105	Texas	Grime	Triatoma sanguisuga	This paper
PZ124931		PS3117	H_105	Texas	Burleson	Triatoma sanguisuga	This paper
KY305719		PS675	H_105	Texas	Montgomery	Triatoma species unknown - nymph	Curtis-Robles et al. 2018
PZ124932		PS6370	H_106	Texas	San Saba	Triatoma sanguisuga	This paper
PZ124933	PZ134248	PS6854	H_107	Texas	Collin	Triatoma sanguisuga	This paper
PZ124934			H_108	Louisiana	No data	Triatoma sanguisuga	This paper
PZ124935		PS4783	H_109	Texas	Fannin	Triatoma sanguisuga	This paper
HQ141315			H_110	Louisiana	Orleans	Triatoma sanguisuga	De la Rua et al. 2011
HQ141316			H_111	Louisiana	Orleans	Triatoma sanguisuga	De la Rua et al. 2011
PZ124936	PZ134253	PS5043	H_112	Mississippi	Union	Triatoma sanguisuga	This paper
PZ124937	PZ134247	PS6068	H_113	Texas	Upshur	Triatoma sanguisuga	This paper
PZ124937		PS4769	H_113	Tennessee	White	Triatoma sanguisuga	This paper
PZ124937		PS6903	H_113	West Virginia	Monongalia	Triatoma sanguisuga	This paper
PZ124937		PS6910	H_113	West Virginia	Wayne	Triatoma sanguisuga	This paper
	PZ134250	PS4991	No data	Texas	Polk	Triatoma sanguisuga	This paper
	PZ134258	FLTS04	No data	Florida	Alachua	Triatoma sanguisuga	This paper
