# Supplementary material for: Genetic variability within Triatoma sanguisuga complex in North America and the redescription of Triatoma ambigua (Neiva 1911), with specimens from Florida, USA
Source: Research Square preprint supplement (doi:10.21203/rs.3.rs-9955037/v1), 2026-06-11
Supplement: Supplementary file 3 [file b97ab011f680a8a917dd9d43.xlsx]

## Sheet: Planilha1
NA	Número prévio de registro	Nome científico	Determinador	Data da determinação	Data do fim da coleta	Nome do Coletor	País	Estado	Município	Localidade	Observação	Número de exemplares	Imaturo	Macho	Fêmea	Preparador do Material (via seca)
5325	CCP2959, 2960	Triatoma sanguisuga	Neiva, A.	1912	VII/1912		Estados Unidos	não_determinado	não_determinado	NA	Oferecido por A.Neiva	2			2
9962	CCP1114	Triatoma sanguisuga	Neiva, A.		V/1903	Harney, L.	Estados Unidos	não_determinado	não_determinado	NA		1		1		Neiva, A.
9997	CCP1063	Triatoma sanguisuga	Neiva, A.		19/XI/1912	Mitchell, J.D.	Estados Unidos	NA	NA	Victoria	Oferecido por A. Neiva.	1			1
9999	CCP1065	Triatoma sanguisuga	Neiva, A.		6/V/1891		Estados Unidos	NA	NA	Ringo	Oferecido por A. Neiva.	1			1
10011	CCP1078, 1087	Triatoma sanguisuga	Neiva, A.		1907	Mitchel, J.D.	Estados Unidos	Texas	NA	Victoria	Oferecido por A. Neiva.	2	1		1
10012	CCP1079	Triatoma sanguisuga	Neiva, A.			Mitchel, J.D.	Estados Unidos	Texas	não_determinado	Victoria	Oferecido por A. Neiva.	1			1
10013	CCP1080	Triatoma sanguisuga	Neiva, A.				Estados Unidos	não_determinado	não_determinado	NA	Oferecido por A. Neiva.	1			1
10014	CCP1081, 1091	Triatoma sanguisuga	Neiva, A.		9/VI/1910	Pratt, F.D.	Estados Unidos	Texas	NA	Sabinal	Oferecido por A. Neiva.	2	2
10015	CCP1082, 1084	Triatoma sanguisuga	Neiva, A.		V/1910	Pratt, F.D.	Estados Unidos	Texas	NA	Sabinal	Oferecido por A. Neiva.	2	2
10016	CCP1083	Triatoma sanguisuga	Neiva, A.		1911	Pratt, F.D.	Estados Unidos	Texas	NA	Sabinal	Oferecido por A. Neiva.	1	1
10017	CCP1085	Triatoma sanguisuga	Neiva, A.			Pratt, F.D.	Estados Unidos	Texas	não_determinado	Bonsville	Oferecido por A. Neiva.	1	1
10018	CCP1086	Triatoma sanguisuga	Neiva, A.		29/XI/1909	Mitchel, F.D	Estados Unidos	Texas	NA	Victoria	Oferecido por A. Neiva.	1	1
10019	CCP1088	Triatoma sanguisuga	Neiva, A.				Estados Unidos	não_determinado	não_determinado	NA	Oferecido por A. Neiva.	1			1
10020	CCP1089	Triatoma sanguisuga ambigua	Neiva, A.	1900-1917? (anos mais ativos do Neiva)	Antes de (1861-1905, anos ativos do Uhler)	Uhler, P.R.	Estados Unidos	Flórida	não_determinado	NA	Oferecido por A. Neiva.	1		1
10022	CCP1092	Triatoma sanguisuga	Neiva, A.		1910	Pratt, F.D.	Estados Unidos	Texas	NA	Sabinal	Oferecido por A. Neiva.	1	1
10023	CCP1093	Triatoma sanguisuga	Neiva, A.		24/XI/1907	Mitchel, F.D.	Estados Unidos	Texas	NA	Victoria	Oferecido por A. Neiva.	1	1
10024	CCP1094	Triatoma sanguisuga	Neiva, A.			Jothens, W.W.	Estados Unidos	Texas	não_determinado	Victoria	Oferecido por A. Neiva.	1		1
10025	CCP1095	Triatoma sanguisuga	Neiva, A.				Estados Unidos	não_determinado	não_determinado	NA	Oferecido por A. Neiva.	1			1
10026	CCP1096	Triatoma sanguisuga	Neiva, A.	1900-1917? (anos mais ativos do Neiva)	Antes de (1861-1905, anos ativos do Uhler)	Uhler, P.R.	Estados Unidos	Flórida	não_determinado	Lake City	Oferecido por P.R.Uhler.	1		1
10027	CCP1097	Triatoma sanguisuga	Neiva, A.			Riley, C.V.	Estados Unidos	não_determinado	não_determinado	NA	Oferecido por A. Neiva.	1		1
10028	CCP1098	Triatoma sanguisuga	Neiva, A.		18/IV/1906	Mitchel, F.D.	Estados Unidos	Texas	NA	Eucinal	Oferecido por A. Neiva. Há dúvida na identificação: T. indictiva ou T. sanguisuga.	1		1
10086	CCP1162	Triatoma sanguisuga ambigua	Packchanion, A.	1937	1937	Packchanion, A.	Estados Unidos	Flórida	não_determinado	NA	Oferecido por Rackchanion	1		1		Rakchanion, A.
