# Supplementary material for: Genetic variability within Triatoma sanguisuga complex in North America and the redescription of Triatoma ambigua (Neiva 1911), with specimens from Florida, USA
Source: Research Square preprint supplement (doi:10.21203/rs.3.rs-9955037/v1), 2026-06-11
Supplement: Supplementary file 4 [file c240edc7e98350a3032e00b9.xlsx]

## Sheet: Master list
Florida	Non-Florida					_WAbdomen	_HeadL	_WxEyes	_AnteOc	_PostOc	_WEye	_Synthlipsis	_WPronotum	_LPronotum	_LScutellum	_1Anten	_2Anten	_3Anten	_4Anten	_1LabialArt	_2LabialArt	_3LabialArt
ID	Sex	Date collected	City/County	State	Total Length	Width of abdomen	Head length	Width across eyes	Ante-ocular region	Post-ocular region	Width of eye	Synthlipsis	Width of pronotum	Length of pronotum	Length of Scutellum	1st antennomere	2nd antennomere	3rd antennomere	4th antennomere	1st labial article	2nd labial article	3rd labial article
FL2024-1	M	2024-07-17	Micanopy, Alachua	Florida	18.71	6.68	3.04	1.66	1.65	0.64	0.445	0.8	4.5	3.23	2.14	0.63	2.64	1.98	0	1.28	2.265	0.62
FL2024-3	M	2024-05-05	Gainesville, Alachua	Florida	19.12	7.21	3.12	1.7	1.73	0.61	0.445	0.8	4.53	3.08	2.38	0.66	2.55	0	0	1.17	2.28	0.56
FL2024-9	M	2024-05-15	Rosewood, Levy County	Florida	16.89	5.89	2.92	1.54	1.57	0.67	0.43	0.69	3.81	2.75	2.13	0.75	0	0	0	1.13	2.17	0.55
FL2024-10	M	2024-05-15	Rosewood, Levy County	Florida	18.05	5.98	2.95	1.58	1.6	0.66	0.41	0.73	4.19	3.04	2.1	0.58	2.42	0	0	1.07	2.34	0.57
FL2024-11	M	2024-05-15	Rosewood, Levy County	Florida	18.995	7.11	3.24	1.76	1.7	0.74	0.475	0.81	4.47	3.22	2.18	0.72	2.7	1.73	0	1.1	2.41	0.61
FL2024-12	M	2024-05-15	Rosewood, Levy County	Florida	17.03	4.97	2.87	1.58	1.58	0.64	0.425	0.76	3.8	2.84	1.99	0.62	2.39	1.68	1.44	1.06	2.18	0.52
FL2024-13	M	2024-05-15	Rosewood, Levy County	Florida	19.56	6.27	3.17	1.74	1.67	0.72	0.48	0.8	4.41	3.03	2.08	0.68	2.34	0	0	1.05	2.34	0.58
FL2024-14	M	2024-05-15	Rosewood, Levy County	Florida	17.12	5.6	2.78	1.57	1.56	0.58	0.405	0.75	3.94	2.77	2.07	0.68	2.17	1.59	1.51	1.01	2.18	0.54
FL2024-15	M	2024-05-15	Rosewood, Levy County	Florida	16.55	5.43	2.71	1.52	1.46	0.52	0.41	0.71	3.86	2.66	2.1	0.65	2.31	1.63	0	1.11	2.24	0.43
FL2024-17	M	2024-06-01	Hawthorne, Alachua County	Florida	17.9	6.36	2.83	1.81	1.6	0.57	0.505	0.77	4.16	2.89	2.26	0.66	2.5	1.78	1.63	1.13	2.14	0.58
FL2024-18	M	2024-05-24	Rosewood, Levy County	Florida	18.65	6.52	3.14	1.85	1.73	0.65	0.51	0.84	4.57	3.09	2.25	0.67	2.72	1.86	0	1.25	2.39	0.56
FL2024-2	F	2024-05-05	Gainesville, Alachua County	Florida	20.75	7.94	3.37	1.72	1.84	0.75	0.435	0.855	4.64	3.22	2.12	0.72	2.53	1.79	0	1.17	2.55	0.58
FL2024-4	F	2024-09-07	Micanopy, Alachua County	Florida	20.05	7.09	3.08	1.78	1.73	0.63	0.47	0.86	4.37	3.16	2.19	0.64	2.44	1.83	0	1.07	2.34	0.58
FL2024-5	F	2023-05-15	Gainesville, Alachua County	Florida	21.91	7.69	3.34	1.76	1.8	0.68	0.45	0.82	4.77	3.34	2.47	0.77	2.69	1.92	1.85	1	2.51	0.57
FL2024-6	F	2023-09-27	Gainesville, Alachua County	Florida	20.835	7.82	3.34	1.69	1.73	0.75	0.435	0.83	4.64	3	2.46	0.72	2.46	1.87	1.61	1.03	2.48	0.6
FL2024-7	F	2023-11-01	Hawthorne, Alachua County	Florida	20.41	8.28	3.23	1.66	1.69	0.77	0.415	0.81	4.57	3.06	2.58	0.68	0	0	0	1.06	2.35	0.56
FL2024-8	F	2023-10-01	Lake City, Columbia County	Florida	20.01	6.28	3.21	1.74	1.77	0.71	0.435	0.86	4.49	3.41	2.25	0.75	2.68	0	0	1.2	2.43	0.6
FL2024-16	F	2024-01-22	Hawthorne, Alachua County	Florida	21.03	7.62	3.2	1.68	1.71	0.71	0.43	0.84	4.88	3.23	2.4	0.69	0	1.66	0	1.17	2.35	0.6
FL2024-19	F	2024-05-24	Rosewood, Levy County	Florida	19.07	6.67	2.9	1.64	1.57	0.64	0.47	0.71	4.04	2.97	1.91	0.63	0	0	0	1.11	2.24	0.52
FL2024-20	F	2024-05-24	Rosewood, Levy County	Florida	21.14	7.86	3.17	1.74	1.67	0.59	0.49	0.77	4.55	3.05	2.56	0.69	2.24	1.68	0	1.12	2.36	0.62
FL2024-21	M	2024-05-24	Rosewood, Levy County	Florida	18.38	7.15	2.97	1.73	1.6	0.55	0.46	0.78	4.23	2.76	2.31	0.65	2.34	1.68	1.75	1.13	2.19	0.5
FDACS1	F	1967-06-10	Seminole County	Florida	19.86	7.13	3.08	1.75	1.6	0.64	0.48	0.79	4.31	3.11	2.21	0.61	2.37	0	0	1.32	2.35	0.62
FDACS2	F	1964-05-14	Torreya State Park, Liberty County	Florida	21.33	8.29	3.22	1.84	1.83	0.58	0.54	0.78	4.59	3.41	2.43	0.76	0	0	0	1.45	2.44	0.59
FDACS3	F	July 1948	Gainesville Alachua County	Florida	20.02	6.79	3.11	1.78	1.65	0.62	0.47	0.81	4.7	3.5	2.09	0.67	2.5	0	0	1.19	2.2	0.56
FDACS4	F	October 1979	Gulf Hammock, Levy County	Florida	19.68	7.06	3.35	1.73	1.74	0.69	0.465	0.8	4.68	3.38	2.23	0.69	2.44	1.49	0	1.11	2.27	0.6
FDACS5	M	2000-05-25	Tomoka State Park, Volusia County	Florida	16.86	5.01	2.65	1.51	1.49	0.52	0.41	0.65	3.74	2.71	1.89	0.52	2.02	0	0	1.11	2.12	0.56
FDACS6	F	1935-06-26	Wekiwa River, Seminole County	Florida	18.48	6.86	3	1.66	1.64	0.63	0.435	0.8	4.05	3.03	2.01	0.56	2.02	1.66	0	1.23	2.25	0.55
FDACS7	F	2006-05-22	Ocala, Marion County	Florida	19.36	7.03	3.04	1.56	1.65	0.63	0.41	0.74	4.46	3.27	2.31	0.62	2.27	1.72	0	1.3	2.24	0.55
FDACS8	M	1981-11-05	Monticello, Jefferson County	Florida	20.82	7.53	3.22	1.87	1.75	0.63	0.545	0.78	4.96	3.42	2.5	0.73	2.75	0	0	1.33	2.31	0.64
FDACS9	F	1965-07-04	Torreya State Park, Liberty County	Florida	22.19	7.92	3.39	1.75	1.78	0.68	0.47	0.84	4.9	3.46	2.82	0.75	2.75	2.1	1.8	1.38	2.39	0.56
FDACS10	M	1991-05-23	Gainesville, Alachua County	Florida	18.51	6.86	3.07	1.6	1.64	0.67	0.43	0.76	4.39	3.29	2.08	0.76	2.43	0	0	1.25	2.35	0.52
FDACS11	F	1985-06-25	Gainesville, Alachua County	Florida	21.01	7.94	3.29	1.77	1.79	0.72	0.47	0.83	4.77	3.22	2.59	0.81	2.47	1.88	1.57	1.23	2.24	0.55
FDACS12	M	1985-03-15	Gainesville, Alachua County	Florida	19.91	7.57	3.3	1.77	1.72	0.7	0.51	0.8	4.91	3.31	2.51	0.77	2.79	1.66	1.71	1.47	2.3	0.57
FDACS13	F	2000-05-25	Tomoka State Park, Volusia County	Florida	19.47	6.88	2.98	1.66	1.62	0.57	0.44	0.79	4.51	3.1	2.15	0.7	2.32	1.52	1.23	1.19	2.3	0.57
FDACS14	F	1963-06-22	Venice, Sarasota County	Florida	18.51	6.64	2.83	1.51	1.54	0.54	0.38	0.75	5.02	2.91	2.26	0.63	2	0	0	1.03	2.23	0.56
FDACS15	F	1986-03-31	Upper Key Largo, Monroe County	Florida	21.14	8.09	3.28	1.7	1.86	0.64	0.45	0.8	4.69	3.33	2.45	0.61	0	0	0	1.19	2.38	0.66
FDACS16	F	1936-09-26	Osceola County	Florida	18.13	6.34	2.95	1.61	1.6	0.61	0.41	0.77	4.23	2.87	1.99	0.7	1.98	1.43	1.38	1.26	2.16	0.49
FDACS17	M	April 1905	Royal Palm Park, Dade County	Florida	17.77	6.76	2.92	1.74	1.55	0.59	0.505	0.74	4.22	3.1	2	0.61	0	0	0	1.06	2.12	0.65
FDACS18	F	June 31, 1972	Gainesville, Alachua County	Florida	18.84	6.47	3.18	1.75	1.64	0.71	0.5	0.78	4.65	3.32	1.99	0.66	2.51	1.83	0.85	1.12	2.41	0.51
FDACS19	F	1981-10-18	Ortona, Glades County	Florida	17.9	6.93	2.62	1.63	1.47	0.45	0.4	0.8	4.08	2.74	2.28	0.51	1.8	0	0	1.22	1.97	0.61
FDACS20	F	1949-11-16	Dade County	Florida	16.51	7.05	3	1.45	1.62	0.67	0.38	0.7	4.09	3.05	2.33	0.63	2.06	0	0	1.05	1.81	0.48
FDACS21	M	1934-10-30	Loxahatchee, Palm Beach County	Florida	17.47	6.45	2.94	1.73	1.53	0.72	0.485	0.76	4.08	2.85	2.12	0.57	2.325	1.45	1.25	1.09	2.18	0.62
FDACS22	F	1905-05-08	Gainesville, Alachua County	Florida	18.2	7.26	2.83	1.6	1.53	0.59	0.44	0.71	4.18	2.99	2.45	0.62	2.26	1.19	0.48	1.15	2.28	0.55
FDACS23	M	1998-06-05	Gainesville, Alachua County, Spring Forest	Florida	18.12	6.59	2.83	1.65	1.59	0.59	0.47	0.73	4.81	3.05	1.93	0.7	2.48	1.68	0	1.2	2.18	0.56
FDACS24	F	1988-07-24	Gainesville, Alachua County	Florida	21.16	7.93	3.07	1.82	1.63	0.6	0.46	0.87	4.69	3.23	2.35	0.695	2.52	1.74	1.76	1.28	2.33	0.54
FDACS25	F	1997-05-21	Myakka City, Manatee County	Florida	18.08	6.09	2.85	1.56	1.55	0.5	0.405	0.75	4.09	3.03	2.12	0.53	1.78	1.415	1.18	1.2	2.17	0.52
FDACS26	F	1992-03-03	Lake Placid, Archbold, Biological station, Highlands County	Florida	18.11	6.67	2.75	1.55	1.5	0.53	0.41	0.71	4.07	2.88	2.13	0.585	1.705	1.15	0	0.99	2.03	0.58
FDACS27	F	2012-07-05	Immokalee, Collier County	Florida	16.74	6.71	2.87	1.52	1.61	0.56	0.385	0.72	3.76	2.39	2.53	0.55	1.97	1.27	0.95	1.12	1.83	0.45
FDACS28	M	1997-07-26	North Port, Sarasota County	Florida	16.69	5.85	2.73	1.6	1.53	0.51	0.44	0.7	4.11	2.92	1.94	0.59	2.15	1.48	1.2	1.14	2.25	0.5
PS4108	F	July 2018	Grayson County	Texas	22.14	7.57	3.47	1.91	1.95	0.7	0.47	0.96	5.35	3.71	2.5	0.77	2.38	1.89	0.82	1.26	2.65	0.66
PS4110	F	July 2018	Grayson County	Texas	20.31	6.67	3.29	1.7	1.69	0.72	0.405	0.92	4.5	3.17	2.26	0.79	2.52	2.18	0	1.11	2.43	0.61
PS4122	F	July 2018	Grayson County	Texas	22.37	8.51	3.52	1.83	1.91	0.72	0.47	0.9	5.18	3.85	2.5	0.81	2.67	0	0	1.27	2.49	0.6
PS4125	F	August 2018	Grayson County	Texas	20.81	7.25	3.33	1.77	2	0.69	0.435	0.91	4.68	3.38	2.39	0.68	2.61	1.92	0	1.18	2.44	0.6
PS4126	F	July 2018	Grayson County	Texas	20.64	7.25	3.4	1.76	1.87	0.74	0.415	0.93	4.55	3.34	2.26	0.73	2.49	1.76	0	1.2	2.49	0.6
PS6916	F	2020 or 2021	Burleson County	Texas	23.34	8.23	3.66	1.86	2.05	0.77	0.46	0.93	5.42	3.73	2.78	0.9	2.95	0	0	1.36	2.65	0.66
PS6920	F	2020 or 2021	Burleson County	Texas	23.21	8.98	3.7	1.9	2.14	0.8	0.44	1.01	5.48	3.75	2.73	1.06	2.89	0	0	1.35	2.8	0.72
PS8438	M	July, unknown year	Bastrop County	Texas	21.88	8.19	3.64	1.86	1.93	0.81	0.485	0.9	4.94	3.53	2.81	0.83	2.76	2.14	1.81	1.4	2.51	0.65
PS8442	M	July, unknown year	Bastrop County	Texas	20.55	7.79	3.43	1.76	1.92	0.67	0.45	0.84	4.77	3.56	2.56	0.79	2.68	1.89	1.57	1.31	2.57	0.62
PS3848	M	July 2018	Williamson County	Texas	19.86	7.44	3.32	1.61	1.88	0.62	0.405	0.84	4.61	3.39	2.5	0.82	2.61	1.9958		1.35	2.4	0.65
PS4709	F	May 2019	White County	Tennessee	21.87	7.74	3.48	1.89	2	0.64	0.46	0.93	5.18	3.7	2.33	0.83	2.79	2.16	1.67	1.36	2.66	0.65
MS2024-1	F	2024-07-15	Gainesville, Ozark County	Missouri	22.51	8.61	3.4	1.81	1.8	0.72	0.47	0.88	4.99	3.41	2.79	0.79	3.29	0	0	1.18	2.48	0.64
FDACS29	F	1978-08-04	Leon Valley, Bexar County	Texas	21.53	8.49	3.36	1.79	1.93	0.61	0.45	0.86	5.1	3.79	2.66	0.59	0	0	0	1.39	2.51	0.68
FDACS30	M	1992-09-02	Madison Davidson County	Tennessee	20.17	6.59	3.18	1.79	1.75	0.62	0.445	0.86	4.86	3.42	2.39	0.73	2.51	1.88	0	1.29	2.32	0.66
FDACS31	M	1976-06-12	Madison Lodge, Barber County	Kansas	20.66	6.86	3.27	1.51	1.87	0.59	0.38	0.79	4.59	3.46	2.33	0.725	2.6	2.02	0	1.33	2.51	0.44
FDACS32	F	June, unknown year	Southern Pines	North Carolina	22.77	7.55	3.5	1.86	1.94	0.6	0.44	0.97	5.37	3.86	2.73	0.88	2.28	1.87	0	1.51	2.66	0.67
FDACS33	F	2000-08-18	Hollytree, Jackson County	Alabama	22.94	7.74	3.64	1.97	2.11	0.78	0.5	0.93	5.41	3.64	2.65	0	0	0	0	1.33	2.68	0.7
FDACS34	M	1971-10-10	Falls Wake County	North Carolina	21.19	7.28	3.45	1.81	1.93	0.69	0.44	0.94	5.23	3.73	2.49	0.94	2.69	0	0	1.49	2.46	0.61
FDACS35	F	1970-07-20	Falls Wake County	North Carolina	24.43	8.34	3.5	2.08	1.96	0.6	0.54	1.03	6.09	3.8	3.01	0.805	2.675	1.59	0	1.37	2.59	0.71
FDACS36	M	2003-07-21	Eureka Springs, Carroll County	Arkansas	21.52	7.99	3.39	1.82	1.89	0.69	0.425	0.94	5.19	3.7	2.59	0.78	2.605	1.76	0	1.26	2.46	0.66
FDACS37	M	1905-05-15	Auburn, Lee County	Alabama	21.21	7.7	3.41	1.84	1.99	0.68	0.49	0.87	5.1	3.69	2.29	0.83	3.06	2	0.51	1.26	2.51	0.69
FDACS38	M	1974-06-23	Praire Du Rocher, Monroe County	Illinois	21.77	7.99	3.29	1.8	1.89	0.6	0.445	0.83	5.34	3.84	2.47	0.77	2.5	0	0	1.48	2.57	0.61
FDACS39	F	1996-07-10	Anne, Arudel County - Edgewater	Maryland	24.32	8.31	3.6	1.96	2.02	0.72	0.495	0.96	5.73	4.02	2.87	0.835	2.79	0	0	1.4	2.66	0.72
FDACS40	F	1973-08-16	Edgard, St. John the Baptist Parrish	Louisana	22.8	7.98	3.5	1.9	1.98	0.68	0.495	0.9	5.32	3.66	2.71	0.79	2.52	2.05	0	1.41	2.69	0.66
FDACS41	F	1974-07-05	Dixon Springs, Pope County	Illinois	20.85	6.72	3.19	1.78	1.86	0.62	0.42	0.91	4.99	3.54	2.21	0.76	2.38	1.63	0	1.43	2.47	0.61
FDACS42	M	1962-08-25	Lowndes County	Georgia	19.14	6.48	2.9	1.65	1.66	0.5	0.465	0.72	4.35	3.13	2.25	0.7	3.11	0	0	1.25	2.3	0.46
FDACS43	F	1968-07-26	Washington on the Brazo State Park, Washington County	Texas	21.86	8.26	3.73	1.93	2	0.75	0.49	0.93	5.33	3.66	2.69	0.92	3.22	2.36	1.33	1.62	2.74	0.62
FDACS44	F	1990-07-31	North Harlowe, Craven County	North Carolina	22.89	8.48	3.37	1.93	1.92	0.56	0.52	0.89	5.3	4.03	2.43	0.725	2.645	1.635	1.84	1.23	2.54	0.67
FDACS45	M	1968-04-21	Kansas City, Jackson County	Missouri	19.44	6.71	3.04	1.73	1.73	0.55	0.425	0.84	4.79	3.35	2.45	0.73	2.45	1.88	0	1.41	2.43	0.56
FDACS46	M	1990-07-17	Talbot, Royal Park	Maryland	21.97	7.68	3.4	1.93	1.66	0.77	0.495	0.99	5.74	3.71	2.76	0.95	2.95	2.22	0	1.49	2.54	0.67
FDACS47	F	1946-08-04	Gibson County	Indiana	20.82	7.08	3.31	1.75	1.86	0.65	0.425	0.89	4.85	3.5	2.34	0.8	2.26	0	0	1.48	2.53	0.63
FDACS48	F	2011-08-06	Big Pine Creek, Hocking County	Ohio	22.96	7.66	3.51	1.87	2	0.7	0.475	0.97	5.5	3.6	2.55	0.84	2.56	0	0	1.4	2.47	0.66
FDACS49	F	2019-04-10	Seguin, Guadalupe County	Texas	22.95	7.99	3.54	1.91	2.03	0.67	0.48	0.98	5.18	4.15	2.74	0.9	2.45	0	0.43	1.33	2.67	0.6
